# Supplementary material for: Systemic Analyses of Cuproptosis-Related lncRNAs in Pancreatic Adenocarcinoma, with a Focus on the Molecular Mechanism of LINC00853
Source: MDPI journal article supplement (doi:10.3390/ijms24097923), 2023-04-27
Supplement: s1 [file s1]

**Supplemental Table S3. Spearman Correlation Results of Immune Invasion and Risk Score**

| immune                                         | cor      | pvalue   |
|------------------------------------------------|----------|----------|
| B cell_TIMER                                   | 0.200366 | 0.007496 |
| T cell CD4+_TIMER                              | -0.17816 | 0.017669 |
| Neutrophil_TIMER                               | 0.215378 | 0.00399  |
| Myeloid dendritic cell_TIMER                   | 0.246961 | 0.00092  |
| B cell naive_CIBERSORT                         | -0.149   | 0.047784 |
| T cell CD8+_CIBERSORT                          | -0.25754 | 0.000539 |
| Monocyte_CIBERSORT                             | -0.18468 | 0.01386  |
| Macrophage M0_CIBERSORT                        | 0.196608 | 0.008721 |
| Mast cell resting_CIBERSORT                    | -0.17967 | 0.016712 |
| Macrophage M0_CIBERSORT-ABS                    | 0.151981 | 0.043446 |
| Myeloid dendritic cell activated_CIBERSORT-ABS | 0.14931  | 0.047311 |
| Mast cell resting_CIBERSORT-ABS                | -0.16793 | 0.025472 |
| Macrophage M1_QUANTISEQ                        | 0.417629 | 7.32E-09 |
| Macrophage M2_QUANTISEQ                        | -0.23436 | 0.001691 |
| Monocyte_QUANTISEQ                             | -0.36528 | 5.76E-07 |
| Neutrophil_QUANTISEQ                           | 0.228714 | 0.002199 |
| NK cell_QUANTISEQ                              | -0.35763 | 1.02E-06 |
| T cell CD8+_QUANTISEQ                          | -0.21414 | 0.00421  |
| T cell regulatory (Tregs)_QUANTISEQ            | -0.1477  | 0.049784 |
| Cancer associated fibroblast_MCPCOUNTER        | 0.16713  | 0.026187 |
| T cell CD4+ naive_XCELL                        | -0.1818  | 0.015445 |
| T cell CD4+ central memory_XCELL               | -0.15684 | 0.037088 |
| T cell CD8+_XCELL                              | -0.21516 | 0.004027 |
| Class-switched memory B cell_XCELL             | -0.17006 | 0.023638 |
| Common lymphoid progenitor_XCELL               | 0.230493 | 0.002026 |
| Common myeloid progenitor_XCELL                | -0.18881 | 0.011839 |
| Endothelial cell_XCELL                         | -0.41702 | 7.74E-09 |
| Cancer associated fibroblast_XCELL             | -0.15287 | 0.042213 |
| Hematopoietic stem cell_XCELL                  | -0.28945 | 9.32E-05 |
| Macrophage M2_XCELL                            | -0.1689  | 0.024618 |
| T cell NK_XCELL                                | -0.25724 | 0.000547 |
| T cell CD4+ Th2_XCELL                          | 0.309606 | 2.75E-05 |
| T cell regulatory (Tregs)_XCELL                | 0.166933 | 0.026367 |
| stroma score_XCELL                             | -0.22533 | 0.002566 |
| Cancer associated fibroblast_EPIC              | 0.194624 | 0.009436 |
| Endothelial cell_EPIC                          | -0.24142 | 0.001207 |
