# Supplementary material for: Systemic Analyses of Cuproptosis-Related lncRNAs in Pancreatic Adenocarcinoma, with a Focus on the Molecular Mechanism of LINC00853
Source: MDPI journal article supplement (doi:10.3390/ijms24097923), 2023-04-27
Supplement: s1 [file s1]

**Supplemental Table S2. High- and low risk patient categories.**

| id           | risk | id           | risk |
|--------------|------|--------------|------|
| TCGA-IB-7888 | high | TCGA-2J-AABO | low  |
| TCGA-FB-A5VM | high | TCGA-H6-A45N | low  |
| TCGA-HZ-8315 | high | TCGA-XD-AAUH | low  |
| TCGA-IB-7893 | high | TCGA-HZ-8519 | low  |
| TCGA-M8-A5N4 | high | TCGA-HV-AA8V | low  |
| TCGA-HV-A7OL | high | TCGA-Q3-A5QY | low  |
| TCGA-IB-7897 | high | TCGA-3A-A9IL | low  |
| TCGA-HZ-A77O | high | TCGA-3E-AAAY | low  |
| TCGA-IB-A5SO | high | TCGA-FB-A4P6 | low  |
| TCGA-HZ-8638 | high | TCGA-XN-A8T5 | low  |
| TCGA-L1-A7W4 | high | TCGA-IB-8127 | low  |
| TCGA-IB-7886 | high | TCGA-S4-A8RM | low  |
| TCGA-3A-A9I9 | high | TCGA-F2-6880 | low  |
| TCGA-2L-AAQJ | high | TCGA-IB-A5ST | low  |
| TCGA-3A-A9IH | high | TCGA-2J-AABA | low  |
| TCGA-HZ-7924 | high | TCGA-Q3-AA2A | low  |
| TCGA-HZ-7926 | high | TCGA-LB-A9Q5 | low  |
| TCGA-HZ-A4BH | high | TCGA-HZ-A49G | low  |
| TCGA-FB-AAQ2 | high | TCGA-HZ-A49H | low  |
| TCGA-3A-A9IC | high | TCGA-FB-AAPZ | low  |
| TCGA-FB-AAQ6 | high | TCGA-2J-AABF | low  |
| TCGA-2J-AAB1 | high | TCGA-HZ-8002 | low  |
| TCGA-3E-AAAZ | high | TCGA-HV-A5A6 | low  |
| TCGA-HZ-8637 | high | TCGA-HZ-8001 | low  |
| TCGA-FB-AAPU | high | TCGA-HZ-7923 | low  |
| TCGA-HZ-7922 | high | TCGA-HZ-7920 | low  |
| TCGA-2J-AABU | high | TCGA-IB-A6UF | low  |
| TCGA-US-A77J | high | TCGA-HV-A5A5 | low  |
| TCGA-3A-A9J0 | high | TCGA-HZ-7918 | low  |
| TCGA-2L-AAQL | high | TCGA-FB-AAPP | low  |
| TCGA-IB-7887 | high | TCGA-F2-A44H | low  |
| TCGA-IB-A5SP | high | TCGA-IB-AAUW | low  |
| TCGA-3A-A9IB | high | TCGA-3A-A9IS | low  |
| TCGA-IB-7889 | high | TCGA-IB-AAUT | low  |
| TCGA-IB-AAUS | high | TCGA-Z5-AAPL | low  |
| TCGA-F2-A44G | high | TCGA-IB-AAUR | low  |
| TCGA-IB-7890 | high | TCGA-FB-AAPS | low  |
| TCGA-FB-A545 | high | TCGA-2J-AAB4 | low  |
| TCGA-F2-A8YN | high | TCGA-IB-AAUV | low  |
| TCGA-HZ-A49I | high | TCGA-RL-AAAS | low  |

|              |      |              |     |
|--------------|------|--------------|-----|
| TCGA-2L-AAQA | high | TCGA-XD-AAUI | low |
| TCGA-US-A77G | high | TCGA-3A-A9IJ | low |
| TCGA-IB-A5SQ | high | TCGA-FB-AAPY | low |
| TCGA-FB-AAPQ | high | TCGA-H8-A6C1 | low |
| TCGA-FB-AAQ1 | high | TCGA-YB-A89D | low |
| TCGA-2L-AAQE | high | TCGA-YH-A8SY | low |
| TCGA-HZ-8003 | high | TCGA-2J-AABT | low |
| TCGA-IB-AAUU | high | TCGA-3A-A9IX | low |
| TCGA-PZ-A5RE | high | TCGA-3A-A9IV | low |
| TCGA-F2-6879 | high | TCGA-3A-A9IR | low |
| TCGA-HZ-A9TJ | high | TCGA-H6-8124 | low |
| TCGA-US-A77E | high | TCGA-LB-A8F3 | low |
| TCGA-IB-7654 | high | TCGA-YY-A8LH | low |
| TCGA-2J-AAB8 | high | TCGA-FB-A78T | low |
| TCGA-HZ-8005 | high | TCGA-3A-A9I5 | low |
| TCGA-2J-AAB9 | high | TCGA-XN-A8T3 | low |
| TCGA-US-A779 | high | TCGA-IB-AAUP | low |
| TCGA-HZ-7925 | high | TCGA-HZ-8317 | low |
| TCGA-FB-AAQ0 | high | TCGA-RB-AA9M | low |
| TCGA-3A-A9IU | high | TCGA-3A-A9IO | low |
| TCGA-HV-AA8X | high | TCGA-2L-AAQM | low |
| TCGA-HZ-A77Q | high | TCGA-HZ-A8P0 | low |
| TCGA-HZ-7289 | high | TCGA-S4-A8RO | low |
| TCGA-2J-AABH | high | TCGA-S4-A8RP | low |
| TCGA-IB-7645 | high | TCGA-IB-AAUM | low |
| TCGA-IB-7649 | high | TCGA-HZ-A8P1 | low |
| TCGA-IB-AAUN | high | TCGA-2J-AABV | low |
| TCGA-IB-A5SS | high | TCGA-HZ-A77P | low |
| TCGA-2J-AABI | high | TCGA-HV-A5A3 | low |
| TCGA-IB-AAUO | high | TCGA-OE-A75W | low |
| TCGA-2J-AAB6 | high | TCGA-3A-A9IN | low |
| TCGA-IB-7885 | high | TCGA-F2-7276 | low |
| TCGA-IB-7651 | high | TCGA-2J-AABE | low |
| TCGA-IB-7646 | high | TCGA-RB-A7B8 | low |
| TCGA-3A-A9IZ | high | TCGA-IB-A6UG | low |
| TCGA-FB-A7DR | high | TCGA-IB-AAUQ | low |
| TCGA-2J-AABR | high | TCGA-3A-A9I7 | low |
| TCGA-F2-A7TX | high | TCGA-XD-AAUG | low |
| TCGA-XD-AAUL | high | TCGA-HV-A7OP | low |
| TCGA-IB-7644 | high | TCGA-US-A774 | low |
| TCGA-HZ-7919 | high | TCGA-IB-8126 | low |
| TCGA-F2-7273 | high | TCGA-FB-AAQ3 | low |
| TCGA-2L-AAQI | high | TCGA-2J-AABK | low |

|              |      |              |     |
|--------------|------|--------------|-----|
| TCGA-HZ-A4BK | high | TCGA-HV-A5A4 | low |
| TCGA-US-A776 | high | TCGA-FB-A4P5 | low |
| TCGA-IB-A7M4 | high | TCGA-2J-AABP | low |
| TCGA-LB-A7SX | high |              |     |
| TCGA-IB-7652 | high |              |     |
| TCGA-HZ-8636 | high |              |     |
| TCGA-IB-A7LX | high |              |     |
| TCGA-IB-7891 | high |              |     |
