# Supplementary material for: Systemic Analyses of Cuproptosis-Related lncRNAs in Pancreatic Adenocarcinoma, with a Focus on the Molecular Mechanism of LINC00853
Source: MDPI journal article supplement (doi:10.3390/ijms24097923), 2023-04-27
Supplement: s1 [file s1]

**Supplemental Table S1. The association between lncRNAs and  
cuproptosis regulate genes.**

| mRNA  | lncRNA      | Type |
|-------|-------------|------|
| GLS   | LINC02082   | up   |
| LIAS  | AP000892.3  | up   |
| PDHA1 | C1QTNF1-AS1 | up   |
| LIAS  | AL731569.1  | up   |
| LIAS  | AC087741.2  | up   |
| GLS   | AL158055.1  | up   |
| LIAS  | AC104785.1  | up   |
| MTF1  | LINC02384   | up   |
| LIAS  | AL033527.3  | up   |
| PDHB  | MIR100HG    | up   |
| LIAS  | AC092803.1  | up   |
| LIAS  | AC108471.2  | up   |
| LIAS  | AC093297.2  | up   |
| LIAS  | AL023803.1  | up   |
| LIAS  | MCF2L-AS1   | up   |
| PDHA1 | MCF2L-AS1   | up   |
| LIAS  | AL136531.1  | up   |
| LIAS  | STXBP5-AS1  | up   |
| LIAS  | AC005920.1  | up   |
| MTF1  | PINK1-AS    | up   |
| LIAS  | AC008608.2  | up   |
| LIAS  | KCNJ2-AS1   | up   |
| LIAS  | AC026367.1  | up   |
| GLS   | AC026367.1  | up   |
| LIAS  | AC027575.2  | up   |
| LIAS  | AC124016.1  | up   |
| LIPT1 | AC124016.1  | up   |
| LIAS  | AL161772.1  | up   |
| DLAT  | AC022034.1  | up   |
| LIAS  | MINCR       | up   |
| LIAS  | C9orf147    | up   |
| GLS   | C9orf147    | up   |
| GLS   | AC008050.1  | up   |
| LIAS  | AC034198.2  | up   |
| LIAS  | AC009686.2  | up   |
| LIAS  | SCOC-AS1    | up   |
| DLD   | AC005586.1  | up   |
| LIAS  | AL133353.1  | up   |
| GLS   | ST3GAL5-AS1 | up   |

LIAS AC007114.1 up  
GLS LINC01963 up  
LIAS AC106795.2 up  
GLS AC106795.2 up  
LIAS LINC00412 up  
LIAS ATP2B1-AS1 up  
LIAS AC010913.1 up  
DLAT RASAL2-AS1 up  
LIAS SEPSECS-AS1 up  
GLS SEPSECS-AS1 up  
DLD AL357054.4 up  
LIAS AC114271.1 up  
LIAS AC106052.1 up  
LIAS AL158163.2 up  
LIAS MAFG-DT up  
DLAT AF127577.4 up  
GLS AF127577.4 up  
LIAS RN7SL832P up  
LIAS DLEU1 up  
LIAS AL358781.2 up  
GLS AL359532.1 up  
LIAS AL050341.2 up  
LIAS AC097505.1 up  
LIAS AL035420.3 up  
LIAS AC069224.1 up  
GLS LINC01783 up  
LIAS AC124242.1 up  
GLS AC124242.1 up  
GLS AL157871.6 up  
LIAS AC018766.1 up  
LIAS RGMB-AS1 up  
GLS PIK3CD-AS2 up  
LIAS INTS6-AS1 up  
GLS TRAF3IP2-AS1 up  
GLS AL117335.1 up  
GLS ST20-AS1 up  
LIAS TMEM99 up  
LIAS AC006942.1 up  
GLS FLG-AS1 up  
LIAS AC011468.5 up  
LIAS AC025162.2 up  
LIAS AL391807.1 up  
LIAS STX18-AS1 up  
LIAS AL163051.1 up

LIAS CEP83-DT up  
 GLS CEP83-DT up  
 LIAS AC073896.3 up  
 GLS AC073896.3 up  
 LIAS MNX1-AS1 up  
 LIAS CASC2 up  
 GLS CASC2 up  
 LIAS CKMT2-AS1 up  
 GLS CKMT2-AS1 up  
 GLS AC145207.8 up  
 LIAS AC007686.3 up  
 LIAS ZSCAN16-AS1 up  
 LIAS TMEM161B-AS1 up  
 LIPT1 LINC01569 up  
 LIAS AL138762.1 up  
 LIAS EXOC3-AS1 up  
 GLS EXOC3-AS1 up  
 GLS LINC01942 up  
 GLS SDCBP2-AS1 up  
 LIAS AC092171.3 up  
 LIAS LINC02447 up  
 LIAS HNF1A-AS1 up  
 LIAS AC087500.1 up  
 LIAS AC110609.1 up  
 LIAS AC004812.2 up  
 LIAS AL451069.3 up  
 LIAS MESTIT1 up  
 LIAS AL445645.1 up  
 LIAS AC016394.1 up  
 LIAS AL136040.1 up  
 CDKN2A MIRLET7BHG up  
 LIPT1 AC124798.1 up  
 LIPT1 LINC00853 up  
 LIAS LINC00847 up  
 LIAS ZNF213-AS1 up  
 LIAS ZNF426-DT up  
 PDHB BOLA3-AS1 up  
 LIAS UCKL1-AS1 up  
 LIAS STK24-AS1 up  
 LIAS AC096733.2 up  
 GLS AC096733.2 up  
 LIAS AC022916.1 up  
 LIAS MAN1B1-DT up  
 LIAS STAM-AS1 up

LIAS AC004477.1 up  
LIAS AC010327.5 up  
LIAS TMPO-AS1 up  
GLS AC127070.1 up  
LIAS LINC01144 up  
LIAS AC109347.1 up  
LIAS LINC00641 up  
FDX1 MKLN1-AS up  
LIAS AC118553.1 up  
LIAS AC145207.5 up  
PDHA1 AP001542.3 up  
LIAS AL451064.1 up  
LIAS DICER1-AS1 up  
PDHB AC098484.1 up  
LIAS AC023632.2 up  
GLS AC023632.2 up  
LIAS C5orf38 up  
GLS C5orf38 up  
LIAS SNHG8 up  
LIAS COA6-AS1 up  
LIAS AC020558.2 up  
GLS AC020558.2 up  
LIAS AP003721.4 up  
GLS AP003721.4 up  
DLAT SUCLG2-AS1 up  
MTF1 SUCLG2-AS1 up  
GLS AC104564.3 up  
LIAS AC074032.1 up  
GLS LINC01933 up  
GLS SOCS2-AS1 up  
LIAS ZNF337-AS1 up  
LIAS ATP6V0E2-AS1 up  
GLS ATP6V0E2-AS1 up  
LIAS AC119403.1 up  
LIAS AC008966.1 up  
LIAS AC104187.1 up  
LIAS AC064807.1 up  
LIAS AC100810.1 up  
LIAS AC005280.1 up  
GLS AC005280.1 up  
LIAS AL136295.7 up  
GLS NORAD up  
GLS LINC01765 up  
LIAS AC138696.2 up

LIAS SAPCD1-AS1 up  
GLS SAPCD1-AS1 up  
LIAS ARRDC1-AS1 up  
LIAS AC011477.2 up  
LIAS AC063948.1 up  
GLS LINC01252 up  
GLS LAMA5-AS1 up  
LIAS SNHG7 up  
LIAS LINC01003 up  
LIAS TDRKH-AS1 up  
LIAS POLR2J4 up  
LIAS EPB41L4A-AS1 up  
LIAS AL161421.1 up  
GLS AL161421.1 up  
FDX1 AC005828.4 up  
LIAS AL138767.3 up  
GLS AL138767.3 up  
LIAS UGDH-AS1 up  
GLS ZNF667-AS1 up  
LIAS AL604028.1 up  
LIAS AC008438.1 up  
GLS LINC00271 up  
LIAS AL606970.1 up  
GLS AL606970.1 up  
LIAS TSC22D1-AS1 up  
GLS AP001625.2 up  
LIAS AC008105.1 up  
GLS AL354811.1 up  
LIAS CRT3-AS1 up  
LIAS FAM218A up  
GLS FAM218A up  
LIAS LINC01816 up  
LIAS AL157813.1 up  
GLS AC079760.1 up  
LIAS LINC01522 up  
GLS LINC01522 up  
LIAS AC132938.1 up  
LIAS AC005076.1 up  
LIAS AC129507.3 up  
LIAS AL160314.2 up  
LIAS AC107982.3 up  
LIAS AC010997.4 up  
MTF1 LINC00923 up  
LIAS AL135925.1 up

LIAS AL355001.2 up  
LIAS MIS18A-AS1 up  
LIAS AC019131.2 up  
LIAS AC083880.1 up  
LIAS AL008723.2 up  
GLS AL008723.2 up  
LIAS LINC02321 up  
GLS LINC02321 up  
LIAS AP002360.1 up  
LIAS AC007292.1 up  
FDX1 AC006237.1 up  
LIAS AC005062.1 up  
LIAS AC012313.5 up  
GLS AC012313.5 up  
GLS AC106795.5 up  
GLS LINC02256 up  
LIAS AL118558.3 up  
LIAS AC012213.4 up  
GLS AC012213.4 up  
LIAS AC104985.1 up  
GLS AC104985.1 up  
LIAS AC005225.3 up  
MTF1 AC022509.3 up  
GLS AL139384.2 up  
LIAS AC068338.2 up  
LIAS CBR3-AS1up  
LIAS ZNF460-AS1 up  
CDKN2A AL359922.2 up  
MTF1 AC125807.2 up  
LIAS AC107068.1 up  
LIAS AC079174.2 up  
LIAS AL139383.1 up  
DLD AL139383.1 up  
GLS AL139383.1 up  
LIAS AC008124.1 up  
LIAS ARIH2OS up  
LIAS AL590705.1 up  
LIAS C9orf163 up  
LIAS DHRS4-AS1 up  
MTF1 AL031985.3 up  
GLS AC245060.5 up  
LIAS AL121929.2 up  
GLS AL121929.2 up  
LIAS AC139887.2 up

LIAS ZBED5-AS1 up  
LIAS AC005775.1 up  
LIAS AC019257.2 up  
DLAT AC078923.1 up  
LIAS AC012467.2 up  
GLS AL021368.2 up  
GLS AC106795.3 up  
LIAS ELOA-AS1up  
LIAS AC097478.1 up  
LIAS ACVR2B-AS1 up  
LIAS AC009126.1 up  
LIAS AC012442.2 up  
LIAS PPP1R12A-AS1 up  
DLD PPP1R12A-AS1 up  
LIAS MIR200CHG up  
LIAS AC015917.2 up  
LIAS AL162377.1 up  
GLS AL162377.1 up  
DLAT BAALC-AS1 up  
LIAS AC005962.1 up  
LIAS SNHG20 up  
LIAS AL589765.7 up  
GLS AL589765.7 up  
LIAS SNHG11 up  
LIAS DNAJC9-AS1 up  
GLS DNAJC9-AS1 up  
MTF1 AC073046.1 up  
DLAT RHPN1-AS1 up  
LIAS AL133520.1 up  
GLS PAXBP1-AS1 up  
LIAS AC004803.1 up  
MTF1 AC004803.1 up  
LIAS AP001160.3 up  
LIAS AC005899.7 up  
GLS AC093227.1 up  
LIAS AL020996.1 up  
LIAS AC008443.1 up  
DLAT AC099850.3 up  
LIAS AC008393.1 up  
LIAS AC079766.1 up  
LIAS AC008115.4 up  
GLS AC008115.4 up  
GLS LINC01554 up  
LIAS NDUFA6-DT up

LIAS FAM66C up  
GLS FAM66C up  
LIAS AC025181.2 up  
PDHA1 AC025181.2 up  
LIAS TUSC8 up  
LIAS LINC01607 up  
LIAS AC072061.1 up  
LIAS AC008014.1 up  
GLS AC010226.1 up  
LIAS AC008035.1 up  
LIAS AC121338.2 up  
GLS AC121338.2 up  
LIAS BSN-DT up  
FDX1 AC100797.1 up  
LIAS AC095057.3 up  
LIAS AC002470.1 up  
LIAS AC024575.1 up  
LIAS AL121917.1 up  
GLS AC104117.3 up  
LIAS AC006449.6 up  
LIAS FAM27E3 up  
LIAS AC107952.2 up  
GLS AC138649.1 up  
LIAS STIM2-AS1 up  
LIAS AC008105.2 up  
LIAS SNHG6 up  
GLS SNHG6 up  
LIAS AP001412.1 up  
LIAS MAPKAPK5-AS1 up  
LIAS AC002511.1 up  
GLS AC002511.1 up  
LIAS AC156455.1 up  
LIAS AC099684.2 up  
GLS AC099684.2 up  
LIAS Z97653.1 up  
LIAS TRAM2-AS1 up  
LIAS AL132639.2 up  
MTF1 AC115837.1 up  
GLS AL121917.2 up  
LIAS Z95115.1 up  
LIAS CNNM3-DT up  
MTF1 AC018752.1 up  
MTF1 AL133523.1 up  
LIAS TRIM52-AS1 up



GLS TRIM52-AS1 up  
LIAS LINC00957 up  
LIPT1 AC145285.2 up  
DLAT LINC01376 up  
MTF1 AC000403.1 up  
LIAS AC099778.1 up  
GLS RFX3-AS1 up  
LIPT1 AL590096.1 up  
CDKN2A CDKN2B-AS1 up  
LIAS AC002451.1 up  
LIAS AC018413.1 up  
LIAS AC087752.4 up  
LIAS AC008669.1 up  
GLS AC008669.1 up  
LIAS LIFR-AS1 up  
LIAS AC025175.1 up  
GLS AC025175.1 up  
LIAS AC109322.1 up  
LIAS AC087500.2 up  
LIAS RNASEH1-AS1 up  
GLS ADORA2A-AS1 up  
DLD AL356489.2 up  
GLS AL356489.2 up  
LIAS AC087521.2 up  
LIAS AL035071.1 up  
GLS AL035071.1 up  
LIAS MIR7-3HG up  
GLS MIR7-3HG up  
LIAS AL121832.2 up  
LIAS ILF3-DT up  
LIAS AL596202.1 up  
LIAS AC127024.6 up  
LIAS AL035701.1 up  
GLS AL035701.1 up  
LIAS AC010300.1 up  
LIAS ST7-AS1 up  
LIAS AC093752.1 up  
GLS AC093752.1 up  
LIAS AL354696.2 up  
LIAS AC005229.4 up  
GLS AL049838.1 up  
LIAS AC073508.3 up  
LIAS AL135999.3 up  
GLS LINC01018 up

LIAS RBM26-AS1 up  
GLS RBM26-AS1 up  
LIAS LINC01637 up  
LIAS AC116913.1 up  
LIAS AC011477.3 up  
GLS AC011477.3 up  
LIAS ENTPD3-AS1 up  
LIPT1 AC083799.1 up  
LIAS AC020910.5 up  
LIAS AL162411.1 up  
GLS AL162411.1 up  
LIAS AC022306.3 up  
GLS DDN-AS1 up  
LIAS TP53TG1 up  
LIAS AC139530.1 up  
LIAS STPG3-AS1 up  
LIAS MORF4L2-AS1 up  
LIAS NNT-AS1 up  
LIAS NEBL-AS1 up  
LIAS AC010491.1 up  
LIAS AP000757.1 up  
LIAS LINC01006 up  
LIAS PART1 up  
GLS PART1 up  
LIAS ZNF571-AS1 up  
GLS AC087854.1 up  
LIAS AC018521.5 up  
LIAS AC092354.1 up  
LIAS LINC00909 up  
LIAS AC012213.1 up  
GLS AC012213.1 up  
LIAS AL359232.1 up  
MTF1 LINC00940 up  
LIAS AC036176.1 up  
LIAS GLIDR up  
GLS BX293535.1 up  
LIAS BCDIN3D-AS1 up  
GLS BCDIN3D-AS1 up  
LIAS AC079414.3 up  
LIAS GEMIN7-AS1 up  
PDHB ZNF710-AS1 up  
GLS AL022332.1 up  
LIAS AC125257.1 up  
GLS AC125257.1 up

MTF1 AC006064.2 up  
LIAS Z93930.2 up  
LIAS AC121761.2 up  
LIAS NIFK-AS1 up  
LIAS AC120053.1 up  
GLS LINC01146 up  
GLS AC233976.1 up  
LIAS LINC01534 up  
LIAS AL162171.1 up  
GLS AL162171.1 up  
LIAS BX537318.1 up  
GLS AL133325.3 up  
LIAS AL512625.1 up  
LIAS AL354920.1 up  
GLS GRPEL2-AS1 up  
LIAS AL358472.2 up  
GLS AC006369.1 up  
LIAS KIF9-AS1 up  
LIAS LINC01091 up  
LIAS CDC37L1-DT up  
LIAS LINC00653 up  
DLAT LINC00630 up  
MTF1 LINC00630 up  
FDX1 AC010636.1 up  
LIAS DNAJC27-AS1 up  
LIAS TRPC7-AS1 up  
LIAS AC087623.3 up  
LIAS AL139289.2 up  
LIAS AC009403.1 up  
LIAS AC026691.1 up  
LIAS LINC02482 up  
MTF1 AC073254.1 up  
LIAS AC004832.1 up  
GLS AC004832.1 up  
LIAS AF129075.2 up  
LIAS AL359513.1 up  
LIAS VASH1-AS1 up  
LIAS AC097641.2 up  
LIAS LIPE-AS1 up  
LIAS AL121583.1 up  
GLS AL121583.1 up  
GLS ZBED3-AS1 up  
LIAS AC000068.1 up  
GLS AC000068.1 up

LIAS PXN-AS1 up  
GLS AL161804.1 up  
LIAS AC091153.3 up  
LIAS AL023806.1 up  
GLS AL023806.1 up  
LIAS AL645924.1 up  
LIAS AC120498.10 up  
LIAS AL031005.1 up  
LIPT1 AP001830.1 up  
LIAS ZNF433-AS1 up  
LIAS APTR up  
LIAS AP000894.4 up  
GLS AC011445.1 up  
LIAS AC064836.3 up  
LIAS RPARP-AS1 up  
MTF1 OGFRP1 up  
LIAS AL161729.4 up  
LIAS AL138966.2 up  
LIAS AP001486.2 up  
LIAS AC026979.2 up  
LIAS AC087752.3 up  
LIAS HCG14 up  
GLS AC002511.2 up  
GLS AC005540.1 up  
LIAS AL589739.1 up  
FDX1 AC123595.1 up  
LIAS AL391684.1 up  
PDHA1 AC010719.1 up  
LIAS AC005034.4 up  
GLS AC005034.4 up  
LIAS AC092354.2 up  
LIAS AC017100.1 up  
GLS FAM182B up  
LIAS SLC12A5-AS1 up  
GLS SLC12A5-AS1 up  
LIAS AC011477.1 up  
LIAS LINC00467 up  
LIAS Z97055.2 up  
GLS AC006213.5 up  
LIAS AC009812.1 up  
LIAS SEC24B-AS1 up  
LIAS AC096677.1 up  
LIAS AC048382.5 up  
LIAS AC000068.2 up

PDHA1 AC005083.1 up  
LIAS AC015961.2 up  
LIAS AC022893.2 up  
GLS AC022893.2 up  
GLS AC067852.3 up  
GLS AC127070.2 up  
FDX1 AC004825.2 up  
LIAS AC022211.2 up  
GLS AC022211.2 up  
LIAS AC079305.1 up  
LIAS AL356740.1 up  
PDHA1 AL356740.1 up  
LIAS AC090061.1 up  
GLS AC090061.1 up  
LIAS GIHCG up  
LIAS TMEM44-AS1 up  
LIAS CCDC13-AS1 up  
GLS CCDC13-AS1 up  
LIAS LINC01750 up  
GLS AL359715.3 up  
GLS LINC02106 up  
GLS LINC01128 up  
LIAS GNAS-AS1 up  
GLS GNAS-AS1 up  
LIAS AC027644.3 up  
PDHA1 RAB11B-AS1 up  
LIAS AP000350.5 up  
GLS AL049796.1 up  
LIAS AC004241.3 up  
GLS MAGI2-AS3 up  
LIAS AP003559.1 up  
GLS AP003559.1 up  
GLS AC079949.2 up  
GLS AC243830.2 up  
LIAS LINC01484 up  
GLS LINC01484 up  
LIAS AL136295.6 up  
MTF1 AC005562.1 up  
LIAS LINC01431 up  
DLAT LY6E-DT up  
MTF1 AL731577.2 up  
LIAS AC021242.3 up  
GLS AC021242.3 up  
PDHB AC012085.2 up

|       |            |    |
|-------|------------|----|
| GLS   | AL359715.2 | up |
| LIAS  | AC024361.2 | up |
| LIAS  | AC129507.2 | up |
| LIAS  | VLDLR-AS1  | up |
| LIAS  | AC010624.1 | up |
| LIAS  | AC007066.2 | up |
| LIAS  | EDRF1-DT   | up |
| GLS   | COX10-AS1  | up |
| LIAS  | SRP14-AS1  | up |
| MTF1  | LINC00668  | up |
| LIAS  | DANCR      | up |
| PDHA1 | DANCR      | up |
| LIAS  | AC005498.2 | up |
| LIAS  | AC092171.5 | up |
| GLS   | SNHG14     | up |
| FDX1  | GRTP1-AS1  | up |
| LIPT1 | AC009148.1 | up |
| LIAS  | AC068338.3 | up |
| LIAS  | EIF2AK3-DT | up |
| GLS   | AC022400.1 | up |
| LIAS  | AL596244.1 | up |
| LIAS  | AC127024.5 | up |
| LIAS  | AC024075.2 | up |
| LIAS  | AC006538.1 | up |
| LIAS  | AL355472.3 | up |
| LIAS  | AC040169.1 | up |
| GLS   | AC007406.3 | up |
| LIAS  | STX17-AS1  | up |
| GLS   | AL121672.2 | up |
| LIAS  | URB1-AS1   | up |
| LIAS  | AL355312.3 | up |
| LIAS  | MALINC1    | up |
| LIAS  | AL021368.3 | up |
| GLS   | AL021368.3 | up |
| LIAS  | SREBF2-AS1 | up |
| GLS   | AL390208.1 | up |
| LIAS  | AL137779.2 | up |
| LIAS  | AC064807.4 | up |
| FDX1  | AC006001.2 | up |
| LIAS  | AL732314.6 | up |
| LIAS  | AL136304.1 | up |
| LIAS  | LINC00663  | up |
| LIAS  | AC022098.3 | up |
| LIAS  | LINC01370  | up |

|        |             |    |
|--------|-------------|----|
| GLS    | LINC01370   | up |
| GLS    | AL137009.1  | up |
| LIAS   | AC023509.3  | up |
| MTF1   | AL139035.1  | up |
| LIAS   | AC108134.4  | up |
| LIPT1  | AC090527.3  | up |
| LIAS   | AC002467.1  | up |
| PDHB   | AP001107.5  | up |
| LIAS   | AC138207.2  | up |
| LIAS   | AC068473.5  | up |
| LIAS   | RUNDC3A-AS1 | up |
| MTF1   | AC234775.3  | up |
| CDKN2A | AC138150.2  | up |
| LIAS   | AC092119.3  | up |
| GLS    | AC092119.3  | up |
| GLS    | AC092818.1  | up |
| LIAS   | AL354892.2  | up |
| LIAS   | AC006504.7  | up |
| DLD    | RAP2C-AS1   | up |
| MTF1   | RAP2C-AS1   | up |
| LIAS   | AL133343.2  | up |
| GLS    | AL133343.2  | up |
| LIAS   | SCAMP1-AS1  | up |
| GLS    | SCAMP1-AS1  | up |
| LIAS   | AC133552.5  | up |
| LIAS   | THAP7-AS1   | up |
| LIAS   | FRG1-DT     | up |
| LIAS   | AC092574.1  | up |
| GLS    | AC092574.1  | up |
| LIAS   | LINC00240   | up |
| LIAS   | AC012555.1  | up |
| GLS    | AC012555.1  | up |
| LIAS   | OLMALINC    | up |
| GLS    | OLMALINC    | up |
| LIAS   | AC021087.1  | up |
| GLS    | AC021087.1  | up |
| LIAS   | MIR4458HG   | up |
| LIAS   | EXTL3-AS1   | up |
| GLS    | EXTL3-AS1   | up |
| LIAS   | AP001267.3  | up |
| LIAS   | FGF14-AS2   | up |
| PDHB   | MBNL1-AS1   | up |
| FDX1   | MIR202HG    | up |
| GLS    | AC008808.2  | up |

CDKN2A MIR31HG up  
 LIAS LINC00476 up  
 GLS LINC01197 up  
 LIAS FOXP4-AS1 up  
 LIAS PITPNA-AS1 up  
 FDX1 AC093110.1 up  
 LIAS IL6R-AS1 up  
 GLS IL6R-AS1 up  
 GLS SNTG2-AS1 up  
 LIAS AC034236.2 up  
 LIAS AC005696.1 up  
 PDHA1 AC005696.1 up  
 LIAS OSER1-DT up  
 LIAS AL450998.2 up  
 LIAS AC107375.1 up  
 LIAS MAST4-AS1 up  
 LIAS AC005089.1 up  
 GLS AC005089.1 up  
 LIAS C1orf229 up  
 DLAT USP2-AS1 up  
 LIAS AL136162.1 up  
 MTF1 AC091182.1 up  
 LIAS LINC01315 up  
 LIAS AL122008.3 up  
 LIAS CEBPB-AS1 up  
 LIAS AC011444.1 up  
 LIAS OTUD6B-AS1 up  
 GLS OTUD6B-AS1 up  
 GLS MCPH1-AS1 up  
 LIAS KMT2E-AS1 up  
 LIAS USP27X-AS1 up  
 MTF1 AC104411.1 up  
 LIAS AL356512.1 up  
 LIAS AL589765.1 up  
 GLS AL589765.1 up  
 GLS AC079949.1 up  
 LIAS ZNF793-AS1 up  
 GLS ZNF793-AS1 up  
 FDX1 AC078880.3 up  
 LIAS AC004982.1 up  
 LIAS HDHD5-AS1 up  
 LIAS AL132657.1 up  
 LIPT1 AL592435.1 up  
 LIAS AL356019.2 up



|       |             |      |
|-------|-------------|------|
| GLS   | AL356019.2  | up   |
| LIAS  | AC005911.1  | up   |
| LIAS  | AC022079.2  | up   |
| GLS   | ZNF582-AS1  | up   |
| LIAS  | TTC28-AS1   | up   |
| GLS   | AC124312.3  | up   |
| FDX1  | LINC02038   | up   |
| GLS   | AL158212.3  | up   |
| LIAS  | AC009779.2  | up   |
| LIAS  | SLC25A5-AS1 | up   |
| GLS   | SLC25A5-AS1 | up   |
| LIAS  | SGMS1-AS1   | up   |
| LIAS  | AL118558.4  | up   |
| LIAS  | AC097468.1  | up   |
| GLS   | AC097468.1  | up   |
| LIAS  | ALOX12-AS1  | up   |
| LIAS  | AC125494.2  | up   |
| LIAS  | ERVK9-11    | up   |
| GLS   | ERVK9-11    | up   |
| PDHA1 | AL731684.1  | up   |
| LIAS  | AL133325.2  | up   |
| GLS   | AL133325.2  | up   |
| LIAS  | PSMG3-AS1   | up   |
| LIAS  | AC009118.3  | up   |
| LIAS  | UBA6-AS1    | up   |
| MTF1  | LINC01521   | up   |
| DLAT  | AL450384.2  | down |
| DLAT  | AL096870.2  | down |
| DLAT  | AC135050.6  | down |
| DLAT  | AC084824.5  | down |
| DLAT  | AC245884.8  | down |
| DLAT  | ZNF213-AS1  | down |
| DLD   | MIR4435-2HG | down |
| DLAT  | AC005387.1  | down |
| DLAT  | AC004846.2  | down |
| PDHB  | AL031714.1  | down |
| DLAT  | AL645940.1  | down |
| LIAS  | AC009093.1  | down |
| MTF1  | AL157392.4  | down |
| DLAT  | AC005899.6  | down |
| DLAT  | AL136295.7  | down |
| DLAT  | AC011477.2  | down |
| DLAT  | PTOV1-AS2   | down |
| MTF1  | AC104463.2  | down |

|       |            |      |
|-------|------------|------|
| DLAT  | SEMA3F-AS1 | down |
| DLAT  | ZKSCAN2-DT | down |
| MTF1  | ZKSCAN2-DT | down |
| DLAT  | GUSBP11    | down |
| DLD   | LINC01138  | down |
| PDHB  | AC137932.3 | down |
| MTF1  | AP003352.1 | down |
| LIAS  | CASC15     | down |
| DLAT  | AC012615.1 | down |
| PDHB  | AC009133.1 | down |
| MTF1  | SNHG12     | down |
| DLAT  | AC004148.1 | down |
| LIAS  | AC015712.2 | down |
| DLD   | MIR222HG   | down |
| DLAT  | AC011462.4 | down |
| MTF1  | AC011462.4 | down |
| DLAT  | AL049840.5 | down |
| DLAT  | AC005306.1 | down |
| DLAT  | AL162274.2 | down |
| MTF1  | AC103706.1 | down |
| DLAT  | AP001062.1 | down |
| GLS   | LBX2-AS1   | down |
| MTF1  | AC093788.1 | down |
| MTF1  | AL021707.8 | down |
| DLAT  | AC009283.1 | down |
| MTF1  | AC009283.1 | down |
| LIAS  | AP001189.1 | down |
| PDHA1 | AP001189.1 | down |
| DLD   | AC010542.5 | down |
| MTF1  | AC010542.5 | down |
| DLAT  | AC087741.1 | down |
| DLAT  | AC024075.2 | down |
| DLAT  | AC016957.2 | down |
| DLAT  | U47924.3   | down |
| DLAT  | LINC01089  | down |
| MTF1  | AC005726.3 | down |
| LIAS  | AP001189.3 | down |
| DLAT  | Z69706.1   | down |
| DLAT  | LINC01176  | down |
| DLAT  | AL021707.6 | down |
| MTF1  | AL021707.6 | down |
