# Supplementary material for: Systemic Analyses of Cuproptosis-Related lncRNAs in Pancreatic Adenocarcinoma, with a Focus on the Molecular Mechanism of LINC00853
Source: MDPI journal article supplement (doi:10.3390/ijms24097923), 2023-04-27
Supplement: s1 [file s1]

**Supplemental Table S6. The primers of selected cuproptosis-related lncRNAs.**

| Ensembl_ID      | lncRNA     | Sequence (5' - 3')                                               |
|-----------------|------------|------------------------------------------------------------------|
| ENSG00000224805 | LINC00853  | Forward: AAAGGCTAGGCGATCCCACA<br>Reverse: ACTCCCTAGCTTGGCTCTCCT  |
| ENSG00000265415 | AC099850.3 | Forward: AGGGTCTCGCTATGTTTCCC<br>Reverse: TCTCTGAAGTCCATAGCAGGTC |
| ENSG00000270933 | AC010719.1 | Forward: AGTGGAATGGAGGTTTGGGT<br>Reverse: CCTTCCCTTACCTGTCAGCA   |
| ENSG00000272635 | AC006504.7 | Forward: ACCTGGTCTGCGAGAAATCA<br>Reverse: GCTTGCCCTTGGATCATCAG   |
