# Supplementary material for: Systemic Analyses of Cuproptosis-Related lncRNAs in Pancreatic Adenocarcinoma, with a Focus on the Molecular Mechanism of LINC00853
Source: MDPI journal article supplement (doi:10.3390/ijms24097923), 2023-04-27
Supplement: s1 [file s1]

**Supplemental Table S4. Full names of the 10 cuproptosis related  
regulatory genes**

| Gene symbol | Gene name                                 |
|-------------|-------------------------------------------|
| FDX1        | ferredoxin 1                              |
| LIAS        | lipoyl syndrome                           |
| LIPT1       | lipolytransferase 1                       |
| DLD         | dihydrolipoamide dehydrogenase            |
| DLAT        | dihydrolipoamide s-acetyltransferase      |
| PDHA1       | pyruvate dehydrogenase E1 subunit alpha 1 |
| PDHB        | pyruvate dehydrogenase E1 subunit beta    |
| MTF1        | metal regulatory transcription factor 1   |
| GLS         | Glutaminase                               |
| CDKN2A      | cyclin dependent kinase inhibitor 2A      |
