# Supplementary material for: Systemic Analyses of Cuproptosis-Related lncRNAs in Pancreatic Adenocarcinoma, with a Focus on the Molecular Mechanism of LINC00853
Source: MDPI journal article supplement (doi:10.3390/ijms24097923), 2023-04-27
Supplement: s1 [file s1]

**Supplemental Table S5. Train and test cohort patient grouping information.**

| Train cohort | Test cohort  |
|--------------|--------------|
| TCGA-IB-7888 | TCGA-FB-AAQ1 |
| TCGA-2J-AABO | TCGA-2L-AAQE |
| TCGA-FB-A5VM | TCGA-HZ-8003 |
| TCGA-HZ-8315 | TCGA-YH-A8SY |
| TCGA-IB-7893 | TCGA-2J-AABT |
| TCGA-M8-A5N4 | TCGA-IB-AAUU |
| TCGA-HV-A7OL | TCGA-PZ-A5RE |
| TCGA-IB-7897 | TCGA-3A-A9IX |
| TCGA-H6-A45N | TCGA-F2-6879 |
| TCGA-XD-AAUH | TCGA-3A-A9IV |
| TCGA-HZ-A77O | TCGA-3A-A9IR |
| TCGA-IB-A5SO | TCGA-HZ-A9TJ |
| TCGA-HZ-8519 | TCGA-H6-8124 |
| TCGA-HV-AA8V | TCGA-LB-A8F3 |
| TCGA-Q3-A5QY | TCGA-US-A77E |
| TCGA-3A-A9IL | TCGA-YY-A8LH |
| TCGA-3E-AAAY | TCGA-IB-7654 |
| TCGA-FB-A4P6 | TCGA-FB-A78T |
| TCGA-XN-A8T5 | TCGA-2J-AAB8 |
| TCGA-HZ-8638 | TCGA-3A-A9I5 |
| TCGA-L1-A7W4 | TCGA-HZ-8005 |
| TCGA-IB-7886 | TCGA-2J-AAB9 |
| TCGA-IB-8127 | TCGA-US-A779 |
| TCGA-S4-A8RM | TCGA-HZ-7925 |
| TCGA-3A-A9I9 | TCGA-XN-A8T3 |
| TCGA-F2-6880 | TCGA-FB-AAQ0 |
| TCGA-2L-AAQJ | TCGA-IB-AAUP |
| TCGA-3A-A9IH | TCGA-HZ-8317 |
| TCGA-IB-A5ST | TCGA-3A-A9IU |
| TCGA-HZ-7924 | TCGA-HV-AA8X |
| TCGA-HZ-7926 | TCGA-HZ-A77Q |
| TCGA-2J-AABA | TCGA-HZ-7289 |
| TCGA-HZ-A4BH | TCGA-RB-AA9M |
| TCGA-Q3-AA2A | TCGA-3A-A9IO |
| TCGA-FB-AAQ2 | TCGA-2J-AABH |
| TCGA-LB-A9Q5 | TCGA-IB-7645 |
| TCGA-3A-A9IC | TCGA-2L-AAQM |
| TCGA-HZ-A49G | TCGA-IB-7649 |

|              |              |
|--------------|--------------|
| TCGA-HZ-A49H | TCGA-HZ-A8P0 |
| TCGA-FB-AAPZ | TCGA-S4-A8RO |
| TCGA-2J-AABF | TCGA-IB-AAUN |
| TCGA-HZ-8002 | TCGA-S4-A8RP |
| TCGA-FB-AAQ6 | TCGA-IB-AAUM |
| TCGA-2J-AAB1 | TCGA-HZ-A8P1 |
| TCGA-HV-A5A6 | TCGA-2J-AABV |
| TCGA-HZ-8001 | TCGA-IB-A5SS |
| TCGA-3E-AAAZ | TCGA-2J-AABI |
| TCGA-HZ-7923 | TCGA-IB-AAUO |
| TCGA-HZ-8637 | TCGA-2J-AAB6 |
| TCGA-HZ-7920 | TCGA-IB-7885 |
| TCGA-FB-AAPU | TCGA-IB-7651 |
| TCGA-HZ-7922 | TCGA-HZ-A77P |
| TCGA-IB-A6UF | TCGA-IB-7646 |
| TCGA-HV-A5A5 | TCGA-HV-A5A3 |
| TCGA-2J-AABU | TCGA-OE-A75W |
| TCGA-US-A77J | TCGA-3A-A9IZ |
| TCGA-3A-A9J0 | TCGA-3A-A9IN |
| TCGA-2L-AAQL | TCGA-F2-7276 |
| TCGA-HZ-7918 | TCGA-2J-AABE |
| TCGA-IB-7887 | TCGA-RB-A7B8 |
| TCGA-IB-A5SP | TCGA-IB-A6UG |
| TCGA-FB-AAPP | TCGA-IB-AAUQ |
| TCGA-F2-A44H | TCGA-FB-A7DR |
| TCGA-3A-A9IB | TCGA-2J-AABR |
| TCGA-IB-AAUW | TCGA-3A-A9I7 |
| TCGA-3A-A9IS | TCGA-F2-A7TX |
| TCGA-IB-AAUT | TCGA-XD-AAUL |
| TCGA-Z5-AAPL | TCGA-IB-7644 |
| TCGA-IB-7889 | TCGA-HZ-7919 |
| TCGA-IB-AAUR | TCGA-F2-7273 |
| TCGA-FB-AAPS | TCGA-2L-AAQI |
| TCGA-IB-AAUS | TCGA-XD-AAUG |
| TCGA-2J-AAB4 | TCGA-HZ-A4BK |
| TCGA-F2-A44G | TCGA-US-A776 |
| TCGA-IB-AAUV | TCGA-IB-A7M4 |
| TCGA-RL-AAAS | TCGA-LB-A7SX |
| TCGA-IB-7890 | TCGA-HV-A7OP |
| TCGA-XD-AAUI | TCGA-IB-7652 |
| TCGA-FB-A545 | TCGA-US-A774 |
| TCGA-3A-A9IJ | TCGA-IB-8126 |
| TCGA-F2-A8YN | TCGA-FB-AAQ3 |

|              |              |
|--------------|--------------|
| TCGA-HZ-A49I | TCGA-2J-AABK |
| TCGA-FB-AAPY | TCGA-HV-A5A4 |
| TCGA-2L-AAQA | TCGA-HZ-8636 |
| TCGA-H8-A6C1 | TCGA-FB-A4P5 |
| TCGA-US-A77G | TCGA-2J-AABP |
| TCGA-YB-A89D | TCGA-IB-A7LX |
| TCGA-IB-A5SQ | TCGA-IB-7891 |
| TCGA-FB-AAPQ |              |
